# Supplementary material
Source: MDPI journal article supplement (https://www.mdpi.com/2073-4433/15/3/263)
Supplement: s1 [file s1 › atmosphere-2826821-supplementary.pdf]

# Supplementary Materials:

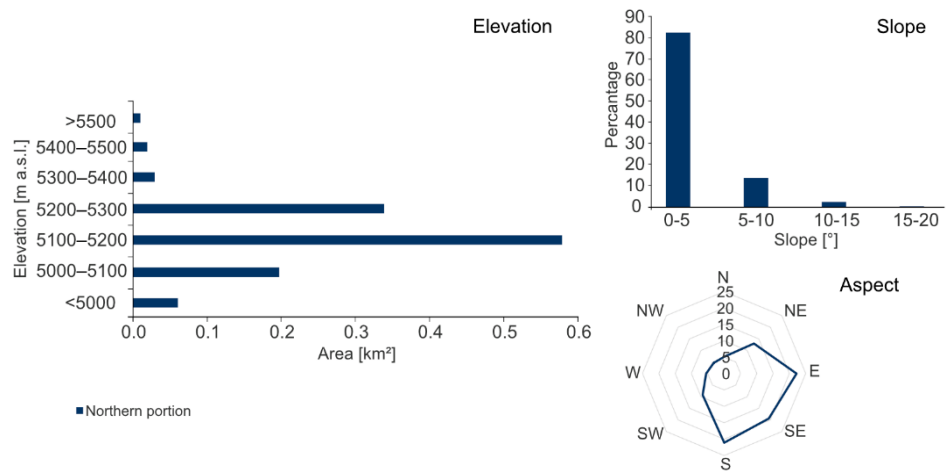

**Figure S1.** Elevation, slope, and aspect of *aufeis* in Pangong Tso Basin (PTB) in autumn 2019.

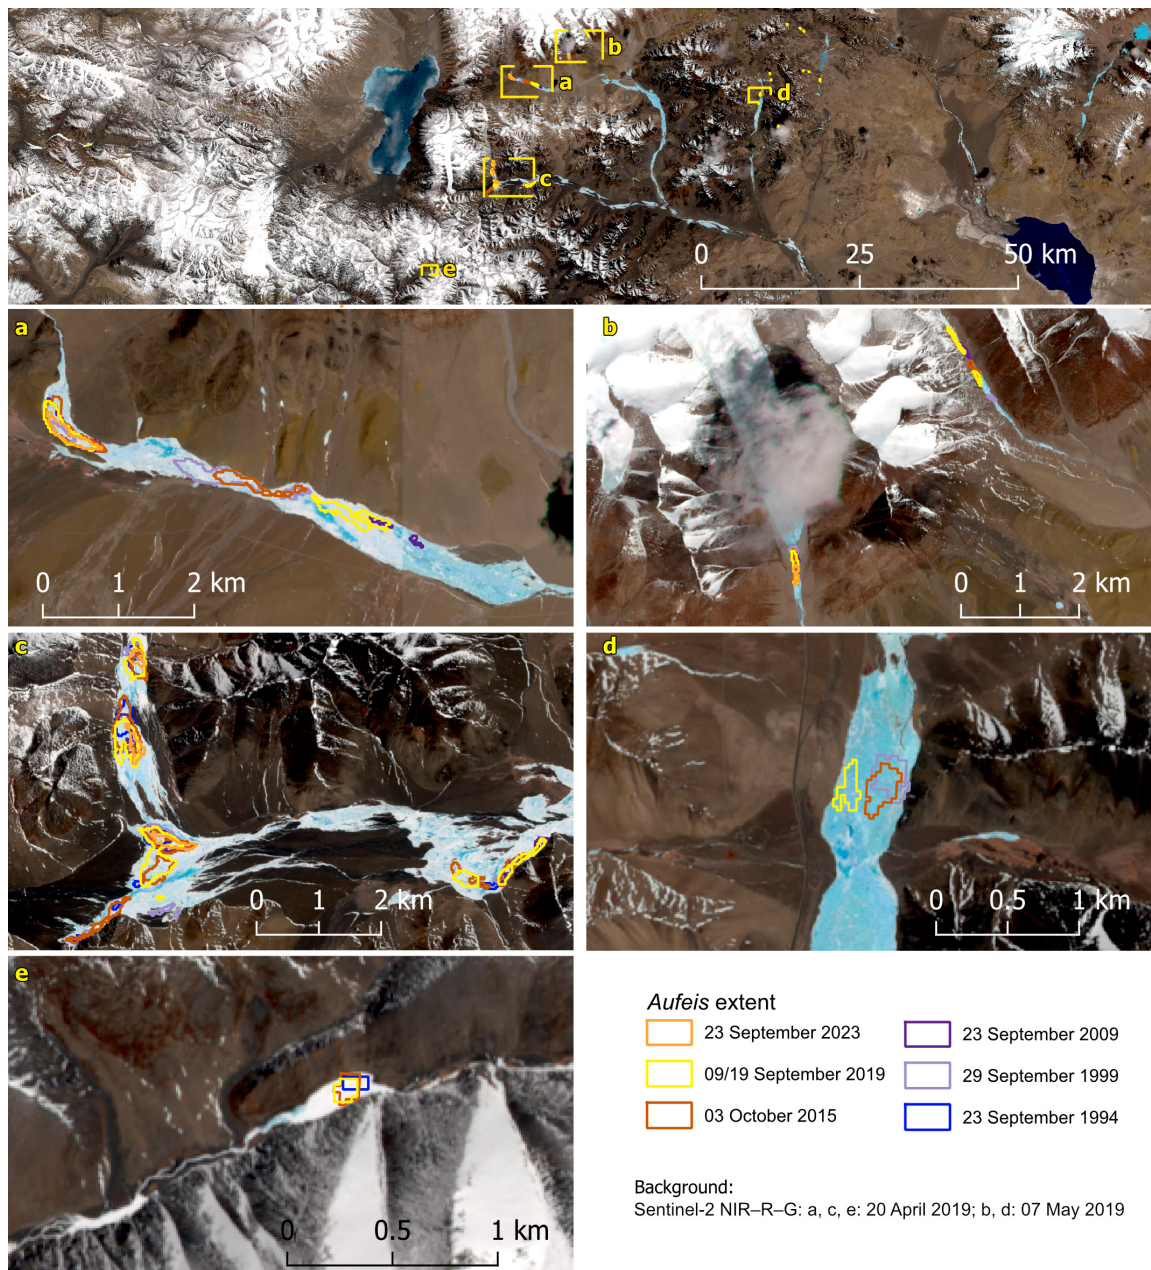

**Figure S2.** Reoccurring spatial pattern of remaining *aufeis* fields in the northern portion of the Pangong Tso Basin (PTB) between 1994 and 2023.
